# Supplementary material for: Hybrid nanovaccine for the co-delivery of the mRNA antigen and adjuvant
Source: Royal Society of Chemistry journal article supplement (doi:10.1039/c9nr05475h), 2019-01-01
Supplement: c9nr05475h1.pdf [file c9nr05475h1.pdf]

## Supplementary Information

### Hybrid nanovaccine for co-delivery of mRNA antigen and adjuvant

Jingnan Yang<sup>1#</sup>, Smriti Arya<sup>2#</sup>, Pingsai Lung<sup>1</sup>, Qiubin Lin<sup>2</sup>, Jiandong Huang<sup>2\*</sup>, Quan Li<sup>1\*</sup>

Table SI1 All DLS results are summarized.

| Formulation                    | Size (nm)    | PDI           | ζ-potential (mV) |
|--------------------------------|--------------|---------------|------------------|
| PLGA                           | 195.2 ± 2.3  | 0.174 ± 0.027 | -20.1 ± 0.8      |
| PLGA@lipid                     | 307.1 ± 6.8  | 0.160 ± 0.028 | 32.7 ± 0.4       |
| Hybrid-mRNA                    | 448.6 ± 11.8 | 0.166 ± 0.048 | 20.6 ± 1.4       |
| Gardiquimod-loaded PLGA        | 204.3 ± 1.5  | 0.067 ± 0.023 | - 22.2 ± 0.5     |
| Gardiquimod-loaded PLGA@lipid  | 348.7 ± 3.9  | 0.191 ± 0.029 | 31.5 ± 0.9       |
| Gardiquimod-loaded hybrid-mRNA | 493.8 ± 1.5  | 0.245 ± 0.016 | 21.2 ± 2.0       |

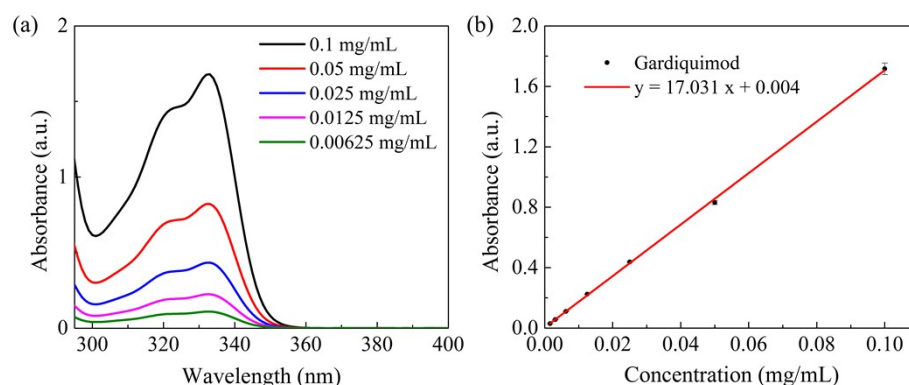

Figure SI1 (a) The absorption spectrum of gardiquimod in DMSO at different concentrations; (b) standard equation of gardiquimod at 333 nm and its linear fitting.

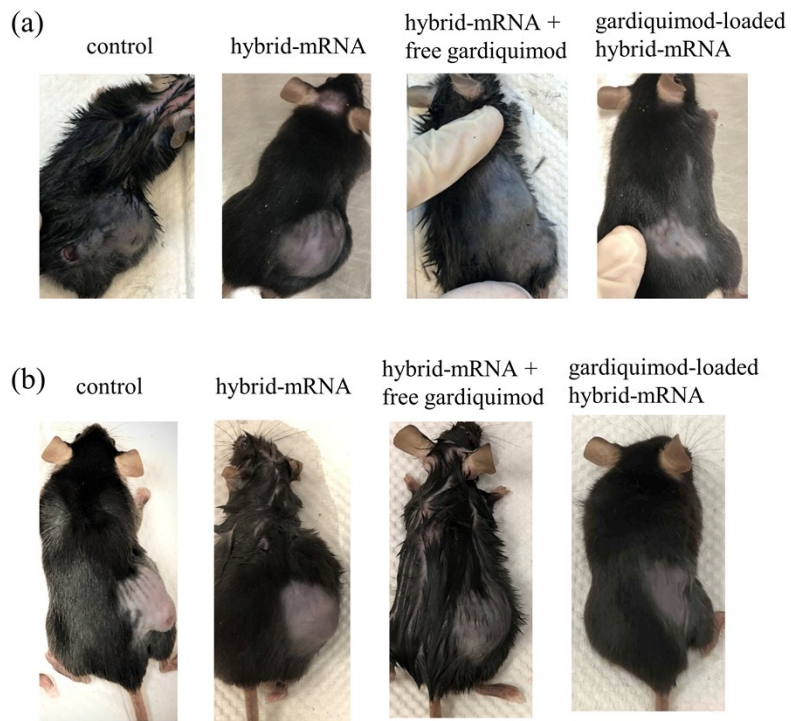

Figure SI2 Representative tumor images in (a) therapeutic model and (b) protective model collected at day 28 and day 26 respectively from tumor inoculation.
